# Supplementary material for: Profiles of Immune Infiltration and Prognostic Immunoscore in Lung Adenocarcinoma
Source: Hindawi journal article supplement (doi:10.1155/2020/5858092), 2020-01-01
Supplement: f1 [file 5858092.f1.pdf]

Supplementary Figure 3: GSEA differentiates the molecular mechanism between high - and low - immune score group;

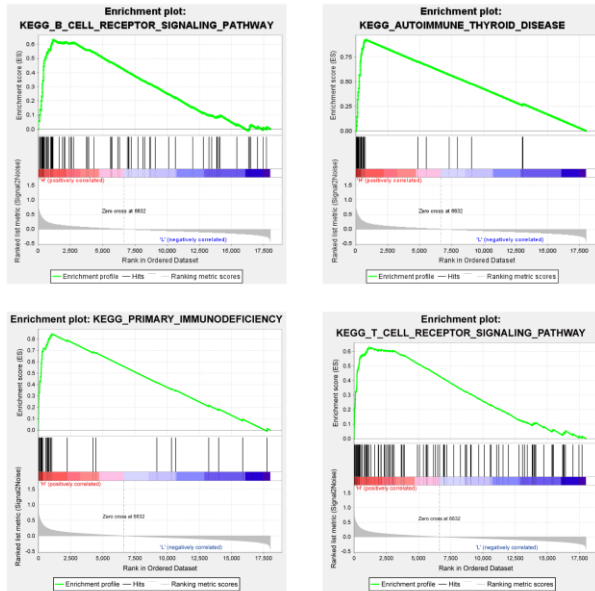

Table S1 The detailed information of GEO chips

| <b>Accession</b> | <b>Platform</b> | <b>Number of normal samples</b> | <b>Number of cancer samples</b> |
|------------------|-----------------|---------------------------------|---------------------------------|
| <b>GSE10072</b>  | GPL80           | 49                              | 58                              |
| <b>GSE101929</b> | GPL570          | 33                              | 33                              |
| <b>GSE32863</b>  | GPL6947         | 58                              | 58                              |
| <b>GSE33356</b>  | GPL96           | 604                             | 60                              |
| <b>GSE33532</b>  | GPL96           | 20                              | 40                              |
| <b>GSE43458</b>  | GPL570          | 30                              | 80                              |
| <b>GSE51855</b>  | GPL570          | 9                               | 49                              |
| <b>GSE68465</b>  | GPL15207        | 19                              | 443                             |
| <b>GSE68571</b>  | GPL6947         | 10                              | 86                              |
| <b>GSE75037</b>  | GPL6947         | 83                              | 83                              |
| <b>Total</b>     | 1361            | 371                             | 990                             |

Table S2 The specific markers of immune signatures for ssGSEA

| Immune response        | Gene symbol                                                                                                                                                                                                                                                       |
|------------------------|-------------------------------------------------------------------------------------------------------------------------------------------------------------------------------------------------------------------------------------------------------------------|
| PD-L1 Response         | IDO2, CD274, IDO1, CTLA4, LAG3, TIGIT, TNFSF9, CD80, CD70                                                                                                                                                                                                         |
| Type I IFN Reponse     | DDX4, IFIT1, IFIT3, IRF7, ISG20, MX1, MX2, RSAD2, TNFSF10                                                                                                                                                                                                         |
| Type II IFN Reponse    | GPR146, SELP, AHR                                                                                                                                                                                                                                                 |
| Check-point            | IDO1, LAG3, TIM-3, IDO2, CD274/PD1, CTLA4, TIGIT                                                                                                                                                                                                                  |
| HLA                    | HLA-E, HLA-DPB2, HLA-C, HLA-J, HLA-DQB1, HLA-DQB2, HLA-DQA1, HLA-DQA2, HLA-A, HLA-DMA, HLA-DOB, HLA-DRB1, HLA-H, HLA-B, HLA-DRB5, HLA-DPB1, HLA-DRA, HLA-DRB6, HLA-L, HLA-F, HLA-G, HLA-DMB, HLA-DPA1                                                             |
| MHC class I            | B2M, HLA-A, TAP1                                                                                                                                                                                                                                                  |
| Parainflammation       | CXCL10, PLAT, CCND1, LGMN, PLAUR, AIM2, MMP7, ICAM1, MX2, CXCL9, ANXA1, TLR2, PLA2G2D, ITGA2, MX1, CD276, TIRAP, IL33, PTGES, TNFRSF12A, SCARB1, CD14, BLNK, IFIT3, RETNLB, IFIT2, ISG15, OAS2, REL, CD44, RRPAG, BST2, OAS1, NOX1, PLA2G2A, IFIT1, IFITM3, IL1RN |
| Inflammation-promoting | CCL5, CD19, CD8B, CXCL10, CXCL13, CXCL9, GNLY, GZMB, IFNG, IL12A, IL12B, IRF1, PRF1, STAR1, TBX21                                                                                                                                                                 |
| T cell co-stimulation  | CD2, CD226, CD27, CD28, CD40LG, ICOS, SLAMF1, TNFRSF18, TNFRSF25, TNFRSF4, TNFRSF8, TNFRSF9, TNFSF14                                                                                                                                                              |
| T cell co-inhibition   | BTLA, C10orf54, CD160, CD244, CD274, CTLA4, HAVCR2, HAVCR2, LAG3, LAIR1, TIGIT                                                                                                                                                                                    |

Table S3 The specific construction of PPI interaction

| Gene     | Count | Fold change |
|----------|-------|-------------|
| APOA2    | 10    | 2.233579    |
| APOB     | 10    | 1.644275    |
| LPA      | 12    | 1.438688    |
| SERPINC1 | 13    | 1.310833    |
| ALB      | 11    | 2.698981    |
| ADIPOQ   | 24    | -2.64953    |
| GCG      | 9     | -6.83411    |
| PSG3     | 8     | -1.42882    |
| PSG4     | 4     | -3.0064     |
| CRP      | 4     | -1.83787    |
| GAGE1    | 13    | -1.58838    |
| RBFOX3   | 9     | 1.256252    |
| UMOD     | 3     | -2.23816    |
| PSG1     | 5     | -3.2024     |
| PRAME    | 7     | -0.96867    |
| AGT      | 12    | 1.022967    |
| SSX1     | 7     | 2.012611    |
| TTR      | 11    | 1.273303    |
| PRL      | 6     | -2.2085     |
| HRG      | 10    | 1.792114    |
| ITIH1    | 1     | 1.480321    |
| SP7      | 1     | 1.383522    |
| APOC3    | 12    | 3.6009      |
| KLK3     | 4     | 1.869852    |
| SPANXC   | 5     | -1.6484     |
| VTN      | 8     | 1.818103    |
| MAGEA4   | 6     | -2.78121    |
| CALB2    | 2     | -1.5283     |
| SPANXD   | 5     | -3.13902    |
| ACTL8    | 1     | -3.05311    |
| FBN2     | 1     | -1.13477    |
| MAGEA9   | 3     | -1.37312    |
| AQP1     | 3     | 1.2         |
| SCGB1A1  | 3     | 1.273383    |
| PLP1     | 1     | 1.368618    |
| SPANXB2  | 2     | 1.235       |
| SERPIND1 | 8     | 1.171029    |
| PSG9     | 2     | -1.19542    |
| MAGEA1   | 6     | -1.18092    |

|         |   |          |
|---------|---|----------|
| AQP2    | 4 | 2.076496 |
| PSG8    | 2 | -3.30832 |
| HPGDS   | 2 | 1.153901 |
| PSG6    | 3 | -2.53943 |
| GIF     | 2 | 3.426055 |
| KRT14   | 2 | -1.41315 |
| MAGEA11 | 1 | -1.00638 |
| RPE65   | 1 | -2.4149  |
